# Supplementary material for: Subcellular localisation modulates ubiquitylation and degradation of Ascl1
Source: PubMed Central journal article supplement (PMC5854709; doi:10.1038/s41598-018-23056-4), 2018-03-15
Supplement: 41598_2018_23056_MOESM1_ESM.pdf [file 41598_2018_23056_MOESM1_ESM.pdf]

## Supplementary Information

### **Subcellular localisation modulates ubiquitylation and degradation of Ascl1**

Sébastien Gillotin<sup>1,2</sup>, John D Davies<sup>1,2</sup> and Anna Philpott<sup>1,2</sup>

<sup>1</sup> Department of Oncology, University of Cambridge, Hutchison/MRC Research Centre, Hills Road, Cambridge CB2 0XZ, UK

<sup>2</sup> Wellcome Trust-Medical Research Council Cambridge Stem Cell Institute, University of Cambridge, Tennis Court Road, Cambridge CB2 1QR, UK

### **Supplementary Figure S1:**

(A) qRT-PCR analysis of mRNA expression levels of pro-proliferative marker genes (Cdk1, Cdk2, E2f1 and Skp2) in Cor3-1 NSCs total mRNA. Fold increase is relative to the sample harvested at day 1. Error bars= SEM; n=3 independent experiments.

(B) qRT-PCR analysis of mRNA expression levels of neuronal differentiation genes (Neurod1 and Tubb3) in Cor3-1 NSCs total mRNA. Fold increase is relative to the sample harvested at day 1. Error bars= SEM; n=3 independent experiments.

(C) Full length gels for Fig. 1C. Nitrocellulose membrane was cut before probing with the respective primary antibody.

(D) Cor3-1 NSCs were treated with cycloheximide in proliferation medium and processed for western blot analysis of whole cell lysates to determine Ascl1 half-life. Representative western blot is shown below the graph. Error bars= SEM; n=3 independent experiments.

(E) Ascl1 Full length gels for Fig. 1D

(F) Ascl1 Full length gels for Fig. 1E

(G) Ascl1 Full length gels for Fig. 1F

A

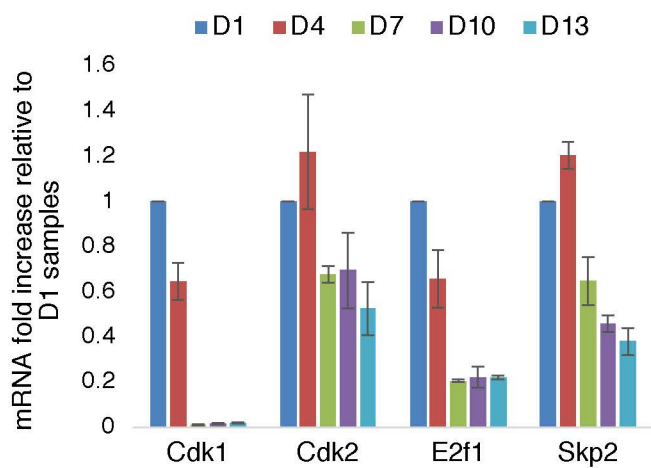

B

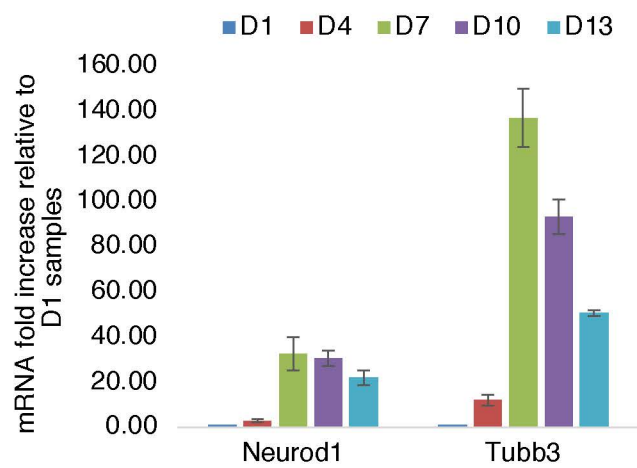

C

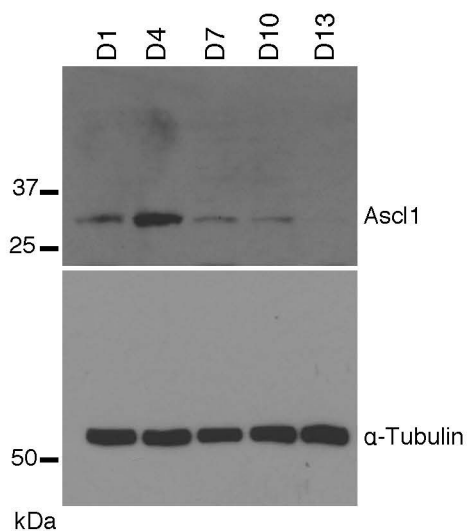

D

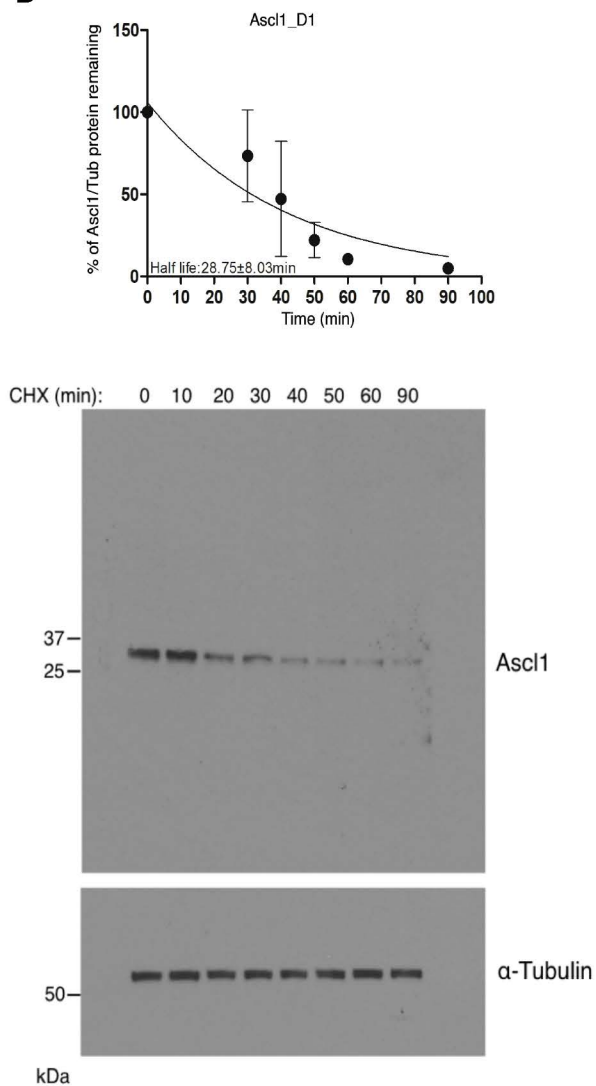

E

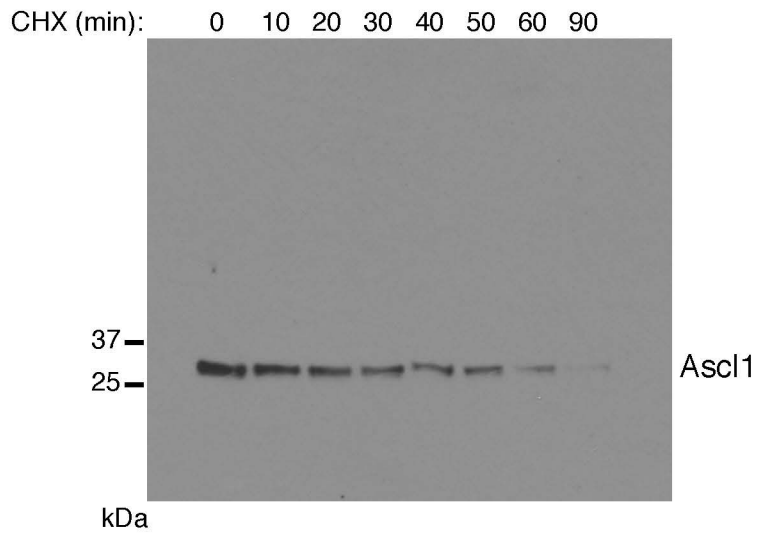

F

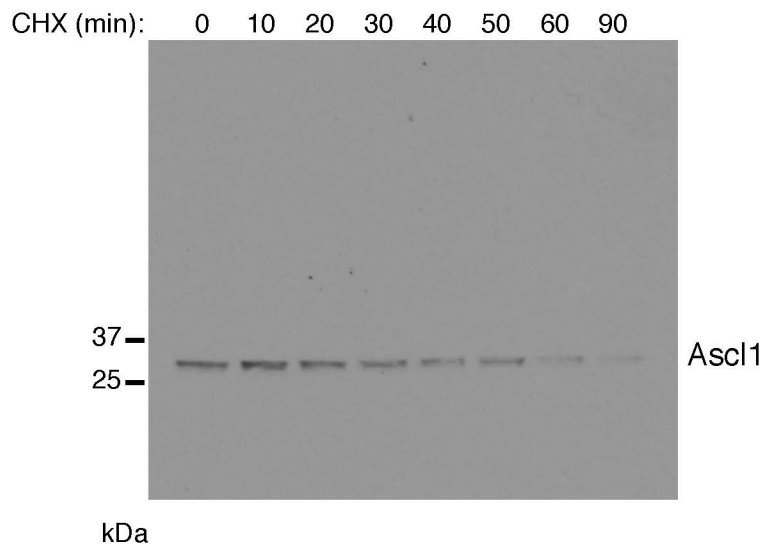

G

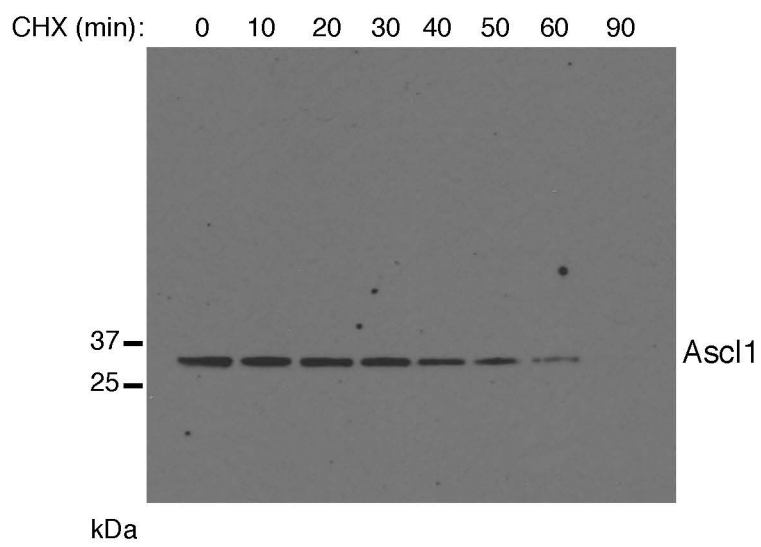

## Supplementary Figure S2:

(A) Full length western blot for  $\alpha$ -Tubulin (loading control for cytoplasmic fraction) for Fig. 2C.

(B) Full length western blot for LaminB (loading control for nuclear fraction) and histone H3 (loading control for chromatin fraction) for Fig. 2C. Nitrocellulose membrane was cut before probing with the respective primary antibody.

(C) Cor3-1 NSCs at day 5 of the neuronal differentiation protocol were either treated with MG132 or DMSO (control) for 2 hours. Cells were fractionated into whole cell lysate (input) and cytoplasm, nucleus and chromatin fractions for western blot analysis. Equal amounts of protein were separated by SDS PAGE and blotted for endogenous Ascl1,  $\alpha$ -Tubulin (loading control for cytoplasmic fraction), LaminB (loading control for nuclear fraction) and histone H3 (loading control for chromatin fraction). Blue bracket, Ascl1 with long ubiquitin chains; black bracket, Ascl1 with short ubiquitin chains.

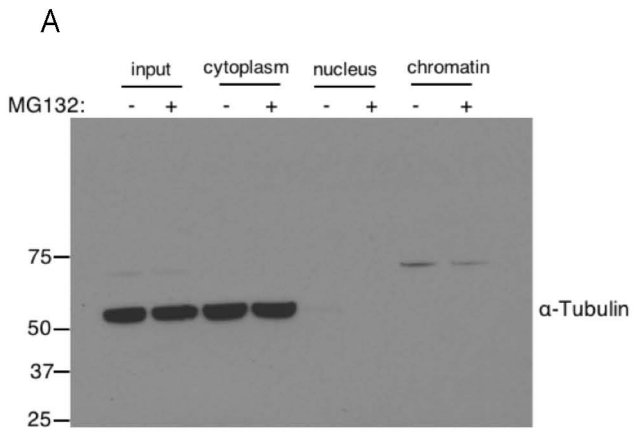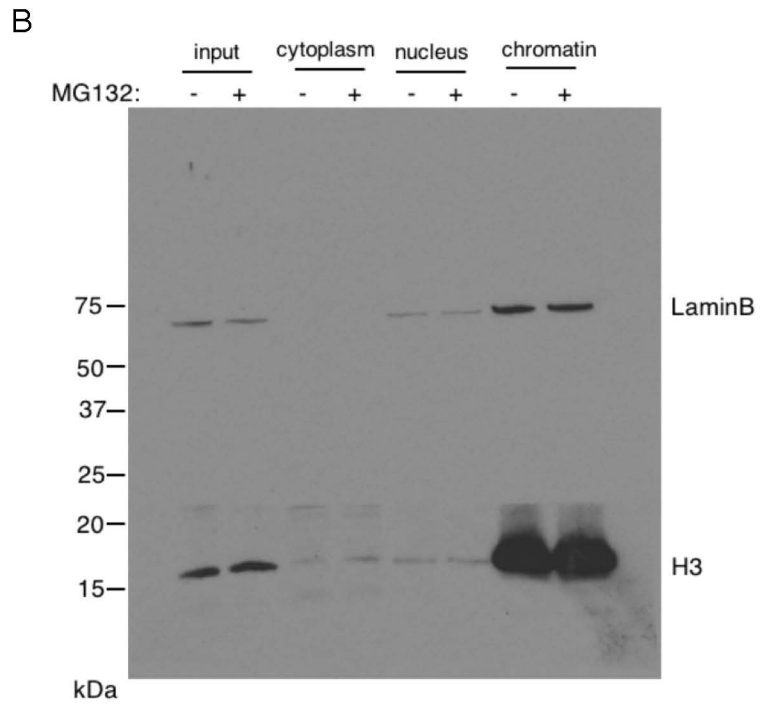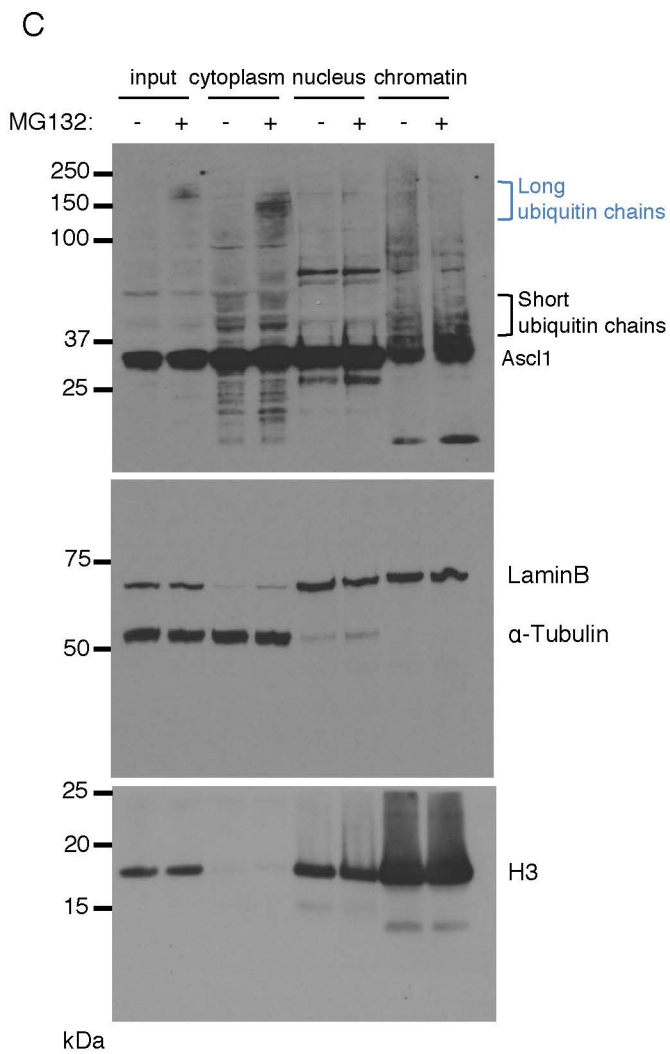

### **Supplementary Figure S3:**

(A) Full length western blots for Ascl1 (top panel) and for  $\alpha$ -Tubulin (bottom panel; loading control for cytoplasmic fraction) for Fig. 3A.

(B) Full length western blots for Ascl1 (top panel; cytoplasmic fraction),  $\alpha$ -Tubulin (second panel; loading control for cytoplasmic fraction), Ascl1 (third panel; chromatin fraction) and histone H3 (bottom panel; loading control for chromatin fraction) for Fig. 3C. Nitrocellulose membrane for each fraction was cut before probing with the respective primary antibody.

(C) Full length western blots for Ascl1 (top panel; cytoplasmic fraction),  $\alpha$ -Tubulin (second panel; loading control for cytoplasmic fraction), Ascl1 (third panel; chromatin fraction) and histone H3 (bottom panel; loading control for chromatin fraction) for Fig. 3D. Nitrocellulose membrane for each fraction was cut before probing with the respective primary antibody.

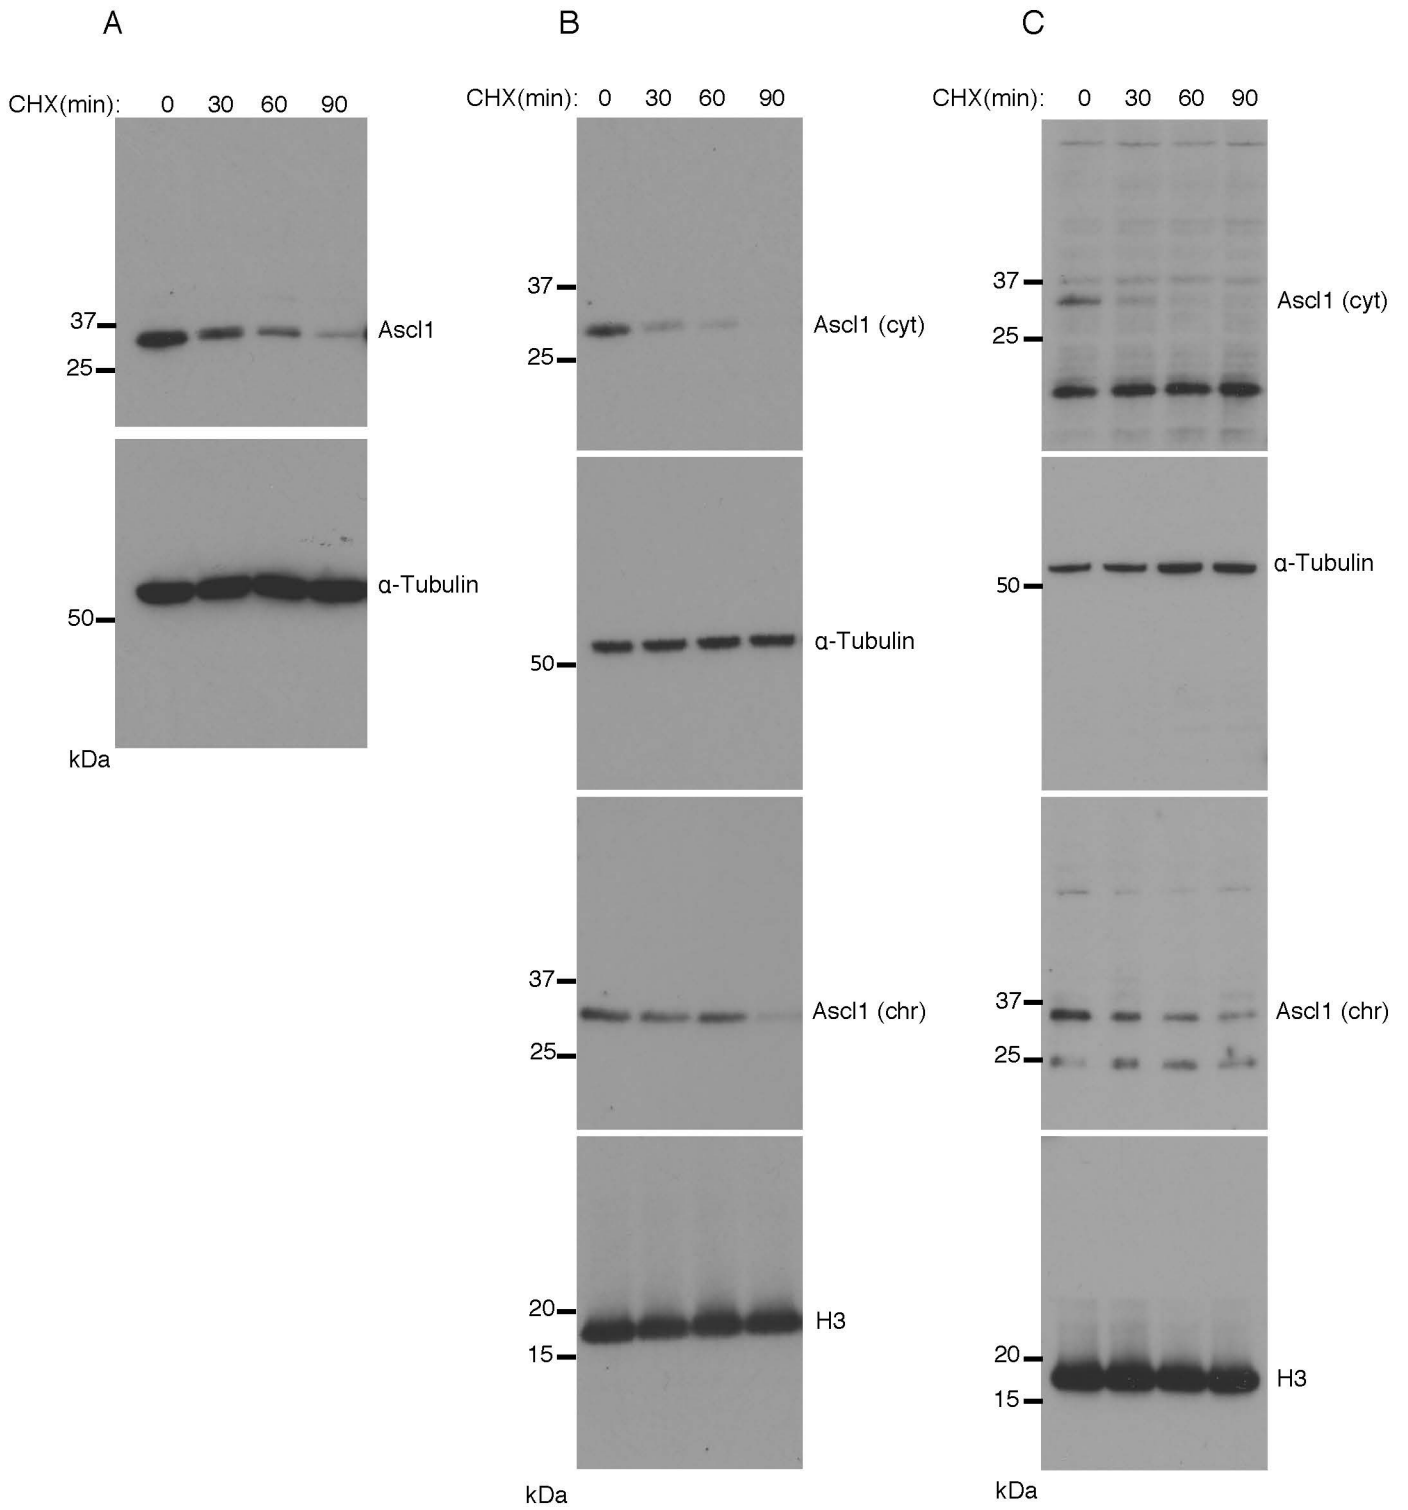



### **Supplementary Figure S4**

(A) Chromatin fractions, with and without cre-mediated knockdown of Huwe1 were incubated with and without MG132 for 2 hours and western blotted to detect free and ubiquitin-conjugated (black bracket) forms of Ascl1. Top panel is long exposure to reveal short molecular weight ubiquitylated forms of Ascl1 (black bracket), bottom Ascl1 panel is short exposure (cropped from the same blot) to show stabilisation of Ascl1 after Huwe1 knockdown, histone H3 (loading control for chromatin fraction, cropped to show specific band of correct molecular weight), n=3.

A

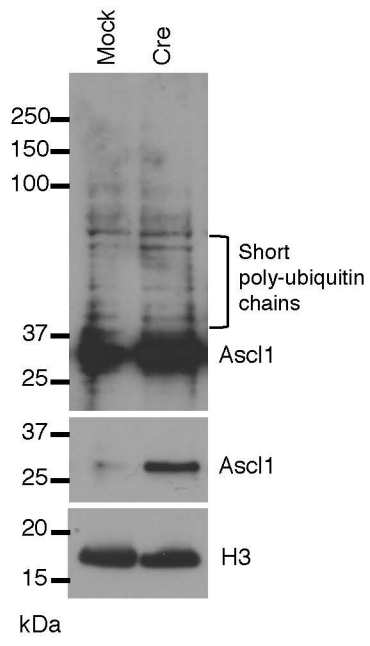

**Supplementary Table S1:** List of primers for analysis of mouse gene expression by qRT-PCR

| Gene          | Left Primer            | Right Primer               |
|---------------|------------------------|----------------------------|
| Ascl1         | TTCTCCGGTCTCGTCCTACTC  | CCAGTTGGTAAAGTCCAGCAG      |
| Cdk1          | CTTCGACATCCAAATATAGTCA | CCAGGAGGGATGGAGTCCAGGTACTT |
| Cdk2          | GGGTCCATCAAGCTGGCAGA   | TGCTCGGTACCACAGGGTCACC     |
| EiF1 $\alpha$ | TAAAGAGGATGGGCAGGAGT   | CTCCTCACACCGTCAAAGCA       |
| E2f1          | TAGCCCTGGGAAGACCTCAT   | CATCCGTGGCAATACTGCTT       |
| Neurod1       | CGCAGAAGGCAAGGTGTC     | TTTGGTCATGTTTCCACTTCC      |
| Skp2          | CATGTGCTGTACCCGAAAGA   | ACTGTGCGCTTGCTCTCCC        |
| Tubb3         | ATTCTGGTGGACTTGGAACCT  | ACTCTTTCCGCACGACATCT       |

## Supplementary Table S2: List of plasmids used in this study

Mutation of Ascl1 lysines was performed by changing the cDNA sequence with the QuickChange II Mutagenesis kit (Agilent Technologies) following the manufacturer's instructions.

| Recombinant gene                   | Species | Source                                                             |
|------------------------------------|---------|--------------------------------------------------------------------|
| pCS2 <sup>+</sup> -wt_Asc1         | Human   | Ali FR et al., 2014 <sup>1</sup>                                   |
| pCS2 <sup>+</sup> -N-term K>R_Asc1 | Human   | This paper                                                         |
| pCS2 <sup>+</sup> -bHLH K>R_Asc1   | Human   | This paper                                                         |
| pCS2 <sup>+</sup> -Full K>R_Asc1   | Human   | This paper                                                         |
| pGL4.26-ΔM short-Luciferase        | Mouse   | Cloned for this paper based on Castro DS et al., 2006 <sup>2</sup> |
| Renilla-TK-Luciferase              |         | Promega (E2241)                                                    |

### References:

- 1 Ali, F. R. *et al.* The phosphorylation status of Ascl1 is a key determinant of neuronal differentiation and maturation in vivo and in vitro. *Development* **141**, 2216-2224, doi:10.1242/dev.106377 (2014).
- 2 Castro, D. S. *et al.* Proneural bHLH and Brn proteins coregulate a neurogenic program through cooperative binding to a conserved DNA motif. *Developmental cell* **11**, 831-844, doi:10.1016/j.devcel.2006.10.006 (2006).
